# Supplementary material
Source: PubMed Central journal article supplement (PMC4272706)
Supplement: AEM.02889-14_zam999105913so1.pdf [file AEM.02889-14_zam999105913so1.pdf]

## Supplemental material

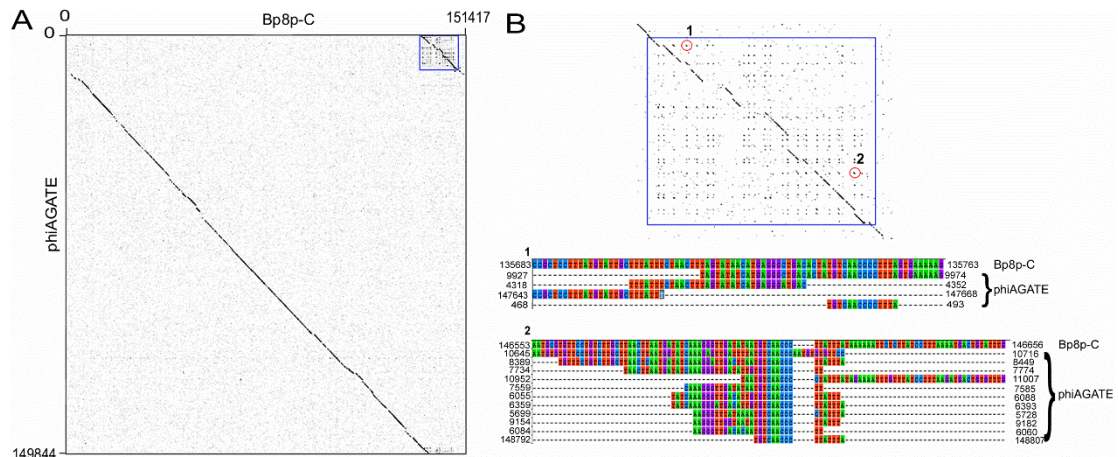

FIG S1 Comparative genome analysis of Bp8p-C and phiAGATE. (A) Dot plot analysis of Bp8p-C and phiAGATE genomes by using Gepard. The long terminal repeat sequences found in both Bp8p-C and phiAGATE genome were indicated in blue rectangle. (B) The long terminal repeat sequence found by dot plot was analyzed using MEGA 5.0.

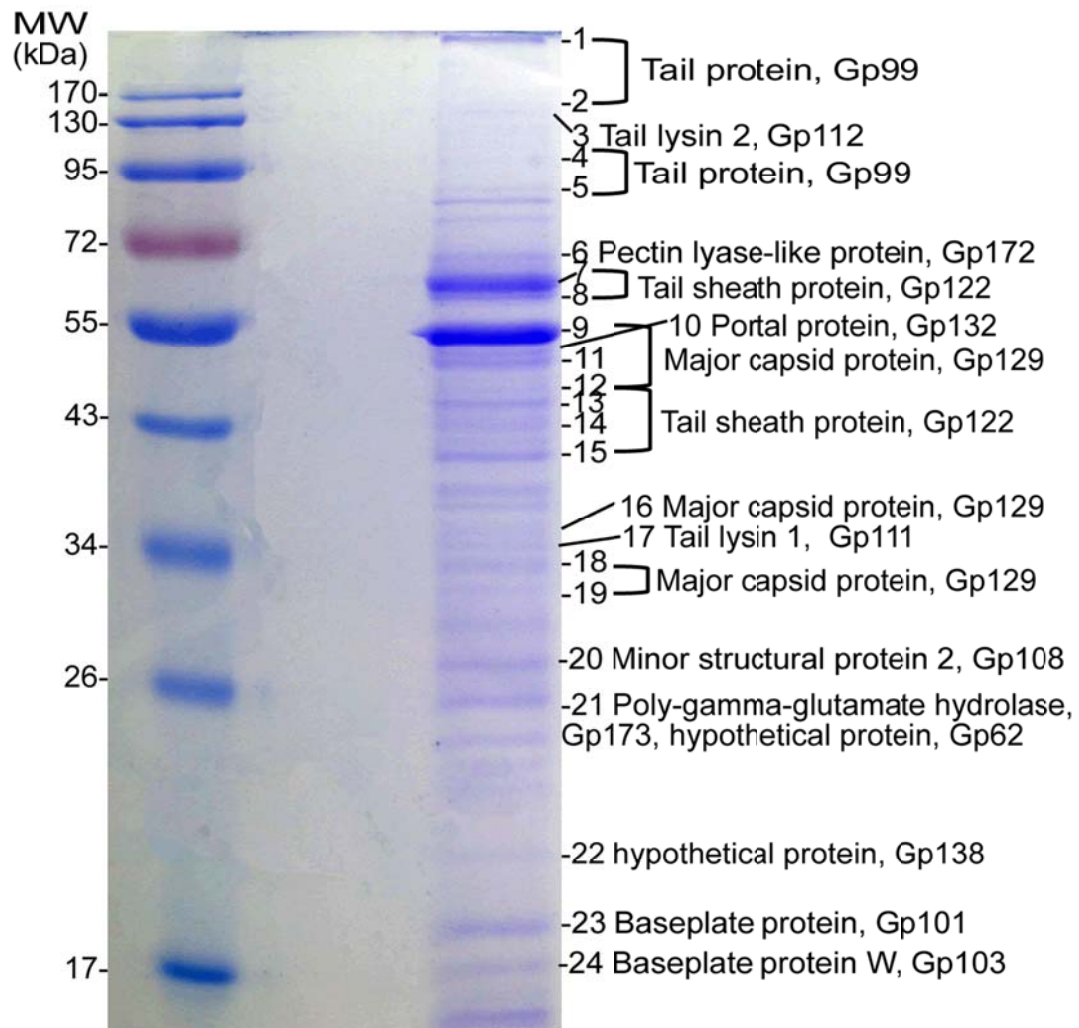

FIG S2 SDS-PAGE analysis of Bp8p-C structural protein. The phage purified by sucrose density gradient centrifugation was analyzed by 12% SDS-PAGE. The molecular weight standard was indicated on the left and the band numbers of the proteins identified by mass spectrometric were also indicated.

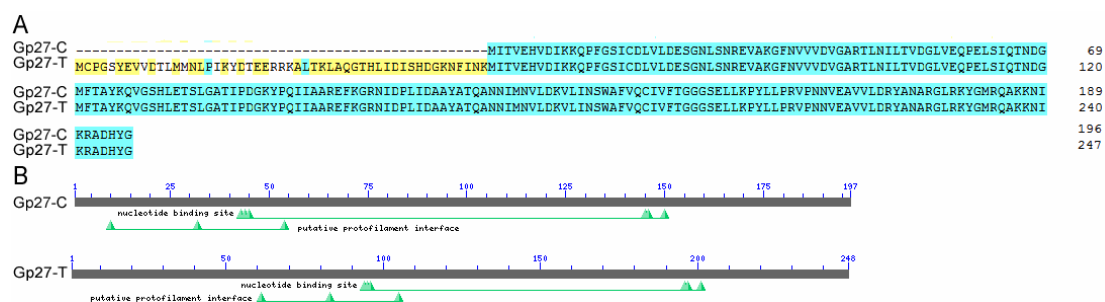

FIG S3 Comparative analysis of Gp27-C and Gp27-T. (A) The alignment of the amino acid sequence of Gp27-C and Gp27-T by using Mega 5.0. (B) The motifs of Gp27-C and Gp27-T were analyzed by searching against the CDD database in NCBI.

Table S1. Host range of phage Bp8p-C and Bp8p-T.

| Strain             | Species                       | Bp8p-C | Bp8p-T |
|--------------------|-------------------------------|--------|--------|
| X3-1 MGSC B 020607 | <i>Bacillus pumilus</i>       | -      | -      |
| 3-J                | <i>Bacillus pumilus</i>       | +      | +      |
| 8-4-Gr31           | <i>Bacillus pumilus</i>       | +      | +      |
| 4-T                | <i>Bacillus pumilus</i>       | +      | +      |
| 5                  | <i>Bacillus pumilus</i>       | +      | +      |
| 2-g2-Gr25          | <i>Bacillus pumilus</i>       | -      | -      |
| 3-t-Gr26           | <i>Bacillus pumilus</i>       | -      | -      |
| 8-1-Gr29           | <i>Bacillus pumilus</i>       | -      | -      |
| 8-2-Gr30           | <i>Bacillus pumilus</i>       | +      | +      |
| 8-3                | <i>Bacillus pumilus</i>       | -      | -      |
| 1-t-Gr20           | <i>Bacillus pumilus</i>       | -      | -      |
| 8-5-Gr32           | <i>Bacillus pumilus</i>       | -      | -      |
| 4-T8               | <i>Bacillus pumilus</i>       | +      | +      |
| GR8                | <i>Bacillus pumilus</i>       | +      | +      |
| CS-33              | <i>Bacillus thuringiensis</i> | -      | -      |
| 168                | <i>Bacillus subtilis</i>      | -      | -      |
| 411a               | <i>Bacillus cereus</i>        | -      | -      |
| 63605              | <i>Bacillus anthracis</i>     | -      | -      |

Table S2. General features of the predicted proteins from Bp8p-C genome

| ORF name | Position (nt) | ORF length (aa) | Size (kDa(22)) | Closest hit (e value)                             | Accession no. of closest hit | The best match in phages (e value)    | Predictive function                           |
|----------|---------------|-----------------|----------------|---------------------------------------------------|------------------------------|---------------------------------------|-----------------------------------------------|
| 1        | -(25..525)    | 166             | 19.7(5.30)     | Bacillus phage vB_BanS-Tsamsa (1e-55)             | AGI11781                     | Bacillus phage vB_BanS-Tsamsa (1e-55) | hypothetical protein                          |
| 2        | -(543..737)   | 64              | 7.54(4.29)     | Bacillus phage Andromeda(8e-21)                   | YP_007517541.1               | Bacillus phage Andromeda(8e-21)       | hypothetical protein                          |
| 3        | -(737..1219)  | 160             | 18.0(6.10)     | Ceratotherium simum simum (1.1)                   | XP_004443172.1               |                                       | hypothetical protein                          |
| 4        | -(1383..1649) | 88              | 10.2(4.61)     | Macaca mulatta (1.8)                              | EHH20558.1                   |                                       | hypothetical protein                          |
| 5        | -(1769..1993) | 74              | 8.62(4.94)     | Bacillus sp. M 2-6 (2e-23)                        | WP_008343969.1               | Bacillus phage phiAGATE(4e-20)        | hypothetical protein                          |
| 6        | -(2032..2913) | 293             | 33.1(4.76)     | Bacillus phage phiAGATE (5e-63)                   | YP_007349276.1               | Bacillus phage phiAGATE (5e-63)       | hypothetical protein                          |
| 7        | -(3037..3357) | 106             | 12.3(6.12)     | Bacillus phage phiAGATE (1e-41)                   | YP_007349277.1               | Bacillus phage phiAGATE (1e-41)       | hypothetical protein                          |
| 8        | -(3311..3541) | 76              | 8.43(7.83)     | Nostoc punctiforme PCC 73102(6.3)                 | YP_001866514.1               |                                       | hypothetical protein                          |
| 9        | -(3538..4335) | 265             | 30.7(5.32)     | Pusillimonas noertemannii(1.7)                    | WP_017525166.1               |                                       | hypothetical protein                          |
| 10       | -(4398..4778) | 126             | 14.6(5.91)     | Bacillus phage phiAGATE (4e-70)                   | YP_007349278.1               | Bacillus phage phiAGATE (4e-70)       | hypothetical protein                          |
| 11       | -(4987..5307) | 106             | 12.2(4.69)     | Bacillus phage SP10(3e-43)                        | YP_007003293.1               | Bacillus phage SP10(3e-43)            | hypothetical protein                          |
| 12       | -(5309..5821) | 170             | 20.3(4.24)     | Bacillus subtilis subsp. subtilis str. 168(1e-09) | NP_389771.1                  |                                       | hypothetical protein                          |
| 13       | -(5867..5992) | 41              | 4.45(9.82)     |                                                   |                              |                                       | hypothetical protein                          |
| 14       | -(6059..6535) | 158             | 18.4(4.66)     | Bacillus phage phiAGATE (3e-100)                  | YP_007349280.1               | Bacillus phage phiAGATE (3e-100)      | hypothetical protein                          |
| 15       | -(6549..7271) | 240             | 27.5(6.04)     | Bacillus phage phiAGATE (1e-137)                  | YP_007349281.1               | Bacillus phage phiAGATE (1e-137)      | hypothetical protein                          |
| 16       | -(7821..8051) | 76              | 8.83(6.58)     | Bacillus phage phiAGATE (4e-43)                   | YP_007349282.1               | Bacillus phage phiAGATE (4e-43)       | putative XRE family transcriptional regulator |
| 17       | -(8074..8361) | 90              | 10.91(5.87)    | Bacillus phage phiAGATE (1e-56)                   | YP_007349283.1               | Bacillus phage phiAGATE (1e-56)       | hypothetical protein                          |
| 18       | -(8361..9068) | 235             | 26.71(4.98)    | Bacillus phage phiAGATE (3e-39)                   | YP_007349284.1               | Bacillus phage phiAGATE (3e-39)       | hypothetical protein                          |
| 19       | -(9070..9342) | 90              | 11.23(4.39)    | Bacillus phage phiAGATE (8e-07)                   | YP_007349285.1               | Bacillus phage phiAGATE (8e-07)       | hypothetical protein                          |
| 20       | -(9356..9568) | 70              | 8.20(6.52)     |                                                   |                              |                                       | hypothetical protein                          |

|    |                 |     |              |                                    |                |                                  |                                             |
|----|-----------------|-----|--------------|------------------------------------|----------------|----------------------------------|---------------------------------------------|
| 21 | -(9532..9705)   | 57  | 6.23(7.900)  | Vibrio phage VpV262(3.4)           | NP_640273.1    | Vibrio phage VpV262(3.4)         | hypothetical protein                        |
| 22 | -(9731..9988)   | 85  | 10.21(8.86)  | Bacillus phage phiAGATE (0.002)    | YP_007349288.1 | Bacillus phage phiAGATE (0.002)  | hypothetical protein                        |
| 23 | -(10070..12298) | 742 | 84.09(5.09)  | Bacillus phage phiAGATE (0.0)      | YP_007349289.1 | Bacillus phage phiAGATE (0.0)    | putative DNA translocase                    |
| 24 | -(12418..13779) | 453 | 50.11(10.15) | Bacillus phage phiAGATE (0.0)      | YP_007349290.1 | Bacillus phage phiAGATE (0.0)    | hypothetical protein                        |
| 25 | -(14427..14975) | 182 | 19.71(6.11)  | Bacillus phage phiAGATE (5E-118)   | YP_007349293.1 | Bacillus phage phiAGATE (5E-118) | putative peptidase M23                      |
| 26 | -(15108..15440) | 110 | 12.63(5.78)  | Bacillus phage phiAGATE (2e-51)    | YP_007349294.1 | Bacillus phage phiAGATE (2e-51)  | hypothetical protein                        |
| 27 | -(15367..15957) | 197 | 21.63(7.74)  | Bacillus phage phiAGATE (5e-134)   | YP_007349295.1 | Bacillus phage phiAGATE (5e-134) | Putative plasmid segregation protein        |
| 28 | -(16543..16974) | 143 | 16.25(8.55)  | Bacillus phage phiAGATE (4e-32)    | YP_007349296.1 | Bacillus phage phiAGATE (4e-32)  | hypothetical protein                        |
| 29 | -(16967..17362) | 131 | 15.09(4.88)  | Bacillus phage phiAGATE (2e-41)    | YP_007349297.1 | Bacillus phage phiAGATE (2e-41)  | hypothetical protein                        |
| 30 | -(17599..17841) | 80  | 9.14(4.00)   | Cohnella laeviribosi(0.83)         | WP_019003802.1 |                                  | hypothetical protein                        |
| 31 | -(17843..18097) | 84  | 9.36(7.81)   | Bacillus phage phiAGATE (6e-28)    | YP_007349300.1 | Bacillus phage phiAGATE (6e-28)  | hypothetical protein                        |
| 32 | -(18124..18312) | 62  | 6.92(4.86)   | Bacillus phage phiAGATE (7e-08)    | YP_007349301.1 | Bacillus phage phiAGATE (7e-08)  | hypothetical protein                        |
| 33 | -(18309..18536) | 75  | 8.79(6.82)   | Weeksella virosa DSM 16922(2.4)    | YP_004238982.1 |                                  | hypothetical protein                        |
| 34 | -(18529..18915) | 128 | 14.15(9.58)  | Bacillus phage phiAGATE (1e-28)    | YP_007349303.1 | Bacillus phage phiAGATE (1e-28)  | hypothetical protein                        |
| 35 | -(18915..19211) | 98  | 11.07(5.17)  | Bacillus phage phiAGATE (1e-15)    | YP_007349304.1 | Bacillus phage phiAGATE (1e-15)  | hypothetical protein                        |
| 36 | -(19214..19402) | 62  | 7.32(10.10)  | Leishmania infantum JPCM5 (2.9)    | XP_001470126.1 |                                  | hypothetical protein                        |
| 37 | -(19557..19925) | 122 | 14.38(10.52) | Erwinia pyrifoliae DSM 12163(0.57) | YP_005801897.1 |                                  | hypothetical protein                        |
| 38 | -(20192..20899) | 235 | 27.06(7.73)  | Bacillus phage phiAGATE (5e-91)    | YP_007349306.1 | Bacillus phage phiAGATE (5e-91)  | putative RNA polymerase sigma factor SigF 2 |
| 39 | -(20935..21714) | 259 | 29.67(5.92)  | Bacillus phage phiAGATE (2e-147)   | YP_007349307.1 | Bacillus phage phiAGATE (2e-147) | putative RNA polymerase sigma factor SigF 1 |
| 40 | -(22188..22823) | 211 | 23.91(5.68)  | Bacillus phage phiAGATE (1e-119)   | YP_007349309.1 | Bacillus phage phiAGATE (1e-119) | hypothetical protein                        |
| 41 | -(22879..23595) | 238 | 27.90(5.61)  | Bacillus phage phiAGATE            | YP_007349310.1 | Bacillus phage phiAGATE          | hypothetical protein                        |

|    |                 |     |              |                                    |                |                                  |  |                                          |  |  |
|----|-----------------|-----|--------------|------------------------------------|----------------|----------------------------------|--|------------------------------------------|--|--|
|    |                 |     |              | (8e-76)                            |                |                                  |  | phiAGATE (8e-76)                         |  |  |
| 42 | -(23704..24702) | 222 | 24.82(9.19)  | Bacillus phage phiAGATE (4e-138)   | YP_007349311.1 | Bacillus phage phiAGATE (4e-138) |  | hypothetical protein                     |  |  |
| 43 | -(24468..25322) | 284 | 32.32(5.26)  | Bacillus phage phiAGATE (2e-174)   | YP_007349312.1 | Bacillus phage phiAGATE (2e-174) |  | hypothetical protein                     |  |  |
| 44 | -(25322..25852) | 176 | 20.07(10.46) | Bacillus phage phiAGATE (2e-105)   | YP_007349313.1 | Bacillus phage phiAGATE (2e-105) |  | hypothetical protein                     |  |  |
| 45 | -(25961..26530) | 189 | 21.55(6.20)  | Bacillus phage phiAGATE (4e-103)   | YP_007349314.1 | Bacillus phage phiAGATE (4e-103) |  | hypothetical protein                     |  |  |
| 46 | -(26627..27349) | 240 | 27.92(8.94)  | Bacillus phage phiAGATE (9e-163)   | YP_007349315.1 | Bacillus phage phiAGATE (9e-163) |  | hypothetical protein                     |  |  |
| 47 | -(27448..27849) | 133 | 14.75(4.47)  | Bacillus phage phiAGATE (3e-40)    | YP_007349316.1 | Bacillus phage phiAGATE (3e-40)  |  | hypothetical protein                     |  |  |
| 48 | -(27836..28288) | 150 | 16.81(5.40)  | Bacillus phage phiAGATE (3e-52)    | YP_007349317.1 | Bacillus phage phiAGATE (3e-52)  |  | hypothetical protein                     |  |  |
| 49 | -(28292..28552) | 86  | 10.58(5.13)  | Bacillus phage phiAGATE (1e-17)    | YP_007349318.1 | Bacillus phage phiAGATE (1e-17)  |  | hypothetical protein                     |  |  |
| 50 | -(28613..28774) | 53  | 5.61(6.49)   | Bacillus phage phiAGATE (2e-10)    | YP_007349319.1 | Bacillus phage phiAGATE (2e-10)  |  | hypothetical protein                     |  |  |
| 51 | -(29405..29590) | 61  | 7.08(9.99)   | Bacillus phage phiAGATE (8e-10)    | YP_007349321.1 | Bacillus phage phiAGATE (8e-10)  |  | hypothetical protein                     |  |  |
| 52 | -(29556..29768) | 70  | 8.42(5.81)   | Bacillus amyloliquefaciens (7e-22) | WP_021493457.1 |                                  |  | hypothetical protein                     |  |  |
| 53 | -(29861..30256) | 131 | 14.34(9.22)  | Bacillus phage phiAGATE (1e-33)    | YP_007349323.1 | Bacillus phage phiAGATE (1e-33)  |  | hypothetical protein                     |  |  |
| 54 | -(30299..31639) | 446 | 51.00(6.30)  | Bacillus phage phiAGATE (0.0)      | YP_007349324.1 | Bacillus phage phiAGATE (0.0)    |  | putative metallo-dependent phosphatase 2 |  |  |
| 55 | -(31658..31939) | 93  | 10.78(4.58)  | Bacillus phage phiAGATE (4e-47)    | YP_007349325.1 | Bacillus phage phiAGATE (4e-47)  |  | hypothetical protein                     |  |  |
| 56 | -(31983..32927) | 314 | 35.40(5.82)  | Bacillus phage phiAGATE (0.0)      | YP_007349326.1 | Bacillus phage phiAGATE (0.0)    |  | hypothetical protein                     |  |  |
| 57 | -(33114..33632) | 172 | 18.62(4.33)  | Bacillus phage Grass (4e-35)       | AGY47405.1     | Bacillus phage Grass (4e-35)     |  | hypothetical protein                     |  |  |
| 58 | -(33652..33972) | 106 | 11.64(6.72)  | Bacillus phage phiAGATE (3e-57)    | YP_007349328.1 | Bacillus phage phiAGATE (3e-57)  |  | Putative holin                           |  |  |
| 59 | -(34015..34587) | 190 | 22.28(5.55)  | Bacillus phage phiAGATE (5e-130)   | YP_007349329.1 | Bacillus phage phiAGATE (5e-130) |  | hypothetical protein                     |  |  |
| 60 | -(34631..34987) | 118 | 13.37(6.29)  | Bacillus phage phiAGATE            | YP_007349330.1 | Bacillus phage phiAGATE          |  | hypothetical protein                     |  |  |

|    |                 |     |             |                                        |                |                                        |                                                                       |                  |  |
|----|-----------------|-----|-------------|----------------------------------------|----------------|----------------------------------------|-----------------------------------------------------------------------|------------------|--|
|    |                 |     |             | (2e-74)                                |                |                                        |                                                                       | phiAGATE (2e-74) |  |
| 61 | -(35034..36245) | 403 | 44.29(5.54) | Bacillus phage phiAGATE (0.0)          | YP_007349331.1 | Bacillus phage phiAGATE (0.0)          | putative DNA recombination and repair protein RecA                    |                  |  |
| 62 | -(36326..37549) | 407 | 43.23(4.98) | Bacillus phage phiAGATE (6e-123)       | YP_007349332.1 | Bacillus phage phiAGATE (6e-123)       | hypothetical protein                                                  |                  |  |
| 63 | -(37645..38130) | 161 | 18.83(5.16) | Bacillus phage phiAGATE (7e-98)        | YP_007349333.1 | Bacillus phage phiAGATE (7e-98)        | hypothetical protein                                                  |                  |  |
| 64 | -(38230..40815) | 861 | 99.71(5.95) | Bacillus phage phiAGATE (0.0)          | YP_007349336.1 | Bacillus phage phiAGATE (0.0)          | putative DNA polymerase A.1                                           |                  |  |
| 65 | -(41596..41992) | 108 | 12.64(6.61) | Bacillus phage phiAGATE (2e-51)        | YP_007349337.1 | Bacillus phage phiAGATE (2e-51)        | putative DNA-binding protein                                          |                  |  |
| 66 | -(41891..42646) | 251 | 29.80(8.98) | Bacillus phage phiAGATE (1e-166)       | YP_007349338.1 | Bacillus phage phiAGATE (1e-166)       | hypothetical protein                                                  |                  |  |
| 67 | -(42753..43271) | 172 | 20.60(6.99) | Bacillus phage phiAGATE (5e-16)        | YP_007349339.1 | Bacillus phage phiAGATE (5e-16)        | hypothetical protein                                                  |                  |  |
| 68 | -(43308..43610) | 100 | 11.78(6.03) | Bacillus phage phiAGATE (3e-29)        | YP_007349339.1 | Bacillus phage phiAGATE (3e-29)        | hypothetical protein                                                  |                  |  |
| 69 | -(43680..43955) | 91  | 10.47(5.81) | Bacillus phage phiAGATE (2e-38)        | YP_007349341.1 | Bacillus phage phiAGATE (2e-38)        | hypothetical protein                                                  |                  |  |
| 70 | -(43971..44135) | 54  | 6.37(4.42)  | Bacillus phage phiAGATE (1e-26)        | YP_007349342.1 | Bacillus phage phiAGATE (1e-26)        | hypothetical protein                                                  |                  |  |
| 71 | -(44328..44564) | 78  | 9.06(5.57)  | Bacillus phage phiAGATE (4e-46)        | YP_007349343.1 | Bacillus phage phiAGATE (1e-26)        | hypothetical protein                                                  |                  |  |
| 72 | -(44554..45144) | 196 | 23.02(9.05) | Bacillus phage phiAGATE (4e-135)       | YP_007349344.1 | Bacillus phage phiAGATE (4e-135)       | hypothetical protein                                                  |                  |  |
| 73 | -(45151..45689) | 112 | 12.86(4.81) | Bacillus phage vB_BceM-Bc431v3 (2e-34) | YP_007676980.1 | Bacillus phage vB_BceM-Bc431v3 (2e-34) | hypothetical protein                                                  |                  |  |
| 74 | -(45492..45686) | 64  | 7.52(5.19)  | Dothistroma septosporum NZE10 (2.6)    | EME39600.1     |                                        | hypothetical protein                                                  |                  |  |
| 75 | -(45785..46222) | 145 | 16.27(4.58) | Bacillus phage phiAGATE (4e-69)        | YP_007349345.1 | Bacillus phage phiAGATE (4e-69)        | hypothetical protein                                                  |                  |  |
| 76 | -(46493..47482) | 329 | 37.58(4.99) | Bacillus phage phiAGATE (0.0)          | YP_007349346.1 | Bacillus phage phiAGATE (0.0)          | putative ribonucleotide reductase of class Ib (aerobic), subunit beta |                  |  |
| 77 | -(47482..47649) | 55  | 6.43(3.92)  | Bacillus phage phiAGATE (2e-20)        | YP_007349347.1 | Bacillus phage phiAGATE (2e-20)        | hypothetical protein                                                  |                  |  |
| 78 | -(47782..49836) | 684 | 78.39(6.00) | Bacillus phage Grass (0.0)             | AGY47378.1     | Bacillus phage Grass (0.0)             | ribonucleotide-diphosphate reductase subunit alpha                    |                  |  |
| 79 | -(50389..50667) | 92  | 10.70(4.46) | Bacillus phage phiAGATE (4e-20)        | YP_007349352.1 | Bacillus phage phiAGATE (4e-20)        | hypothetical protein                                                  |                  |  |

|     |                 |      |              |                                  |                |                                  |                                                           |
|-----|-----------------|------|--------------|----------------------------------|----------------|----------------------------------|-----------------------------------------------------------|
| 80  | -(50867..51259) | 130  | 15.14(10.76) | Bacillus phage phiAGATE (0.80)   | YP_007349353.1 | Bacillus phage phiAGATE (0.80)   | hypothetical protein                                      |
| 81  | -(51275..51562) | 95   | 11.44(10.08) | Bacillus phage phiAGATE (8e-18)  | YP_007349353.1 | Bacillus phage phiAGATE (8e-18)  | hypothetical protein                                      |
| 82  | -(51586..51735) | 49   | 5.59(3.98)   | Bacillus marmarensis (1e-06)     | WP_022628475.1 |                                  | hypothetical protein                                      |
| 83  | -(51698..51919) | 73   | 8.76(8.89)   | Ktedonobacter racemifer (2.1)    | WP_007914275.1 |                                  | hypothetical protein                                      |
| 84  | -(51960..52142) | 60   | 6.89(8.03)   |                                  |                |                                  | hypothetical protein                                      |
| 85  | -(52279..52503) | 74   | 8.47(4.55)   | Bacillus phage phiAGATE (8e-11)  | YP_007349353.1 | Bacillus phage phiAGATE (8e-11)  | hypothetical protein                                      |
| 86  | -(52503..53066) | 187  | 21.62(6.75)  | Bacillus phage phiAGATE (5e-121) | YP_007349362.1 | Bacillus phage phiAGATE (5e-121) | putative resolvase                                        |
| 87  | -(53072..53449) | 125  | 14.36(5.26)  | Bacillus phage phiAGATE (6e-33)  | YP_007349363.1 | Bacillus phage phiAGATE (6e-33)  | hypothetical protein                                      |
| 88  | -(53442..53762) | 106  | 12.17(4.13)  | Bacillus phage phiAGATE (8e-42)  | YP_007349364.1 | Bacillus phage phiAGATE (8e-42)  | hypothetical protein                                      |
| 89  | -(53776..54393) | 205  | 22.52(6.17)  | Bacillus phage phiAGATE (2e-111) | YP_007349365.1 | Bacillus phage phiAGATE (2e-111) | putative deoxyuridine 5'-triphosphate nucleotidohydrolase |
| 90  | -(54465..55535) | 356  | 40.41(4.84)  | Bacillus phage phiAGATE (0.0)    | YP_007349366.1 | Bacillus phage phiAGATE (0.0)    | putative DNA primase                                      |
| 91  | -(55539..56177) | 212  | 24.85(5.49)  | Bacillus phage phiAGATE (1e-91)  | YP_007349367.1 | Bacillus phage phiAGATE (1e-91)  | hypothetical protein                                      |
| 92  | -(56174..58078) | 634  | 72.11(5.98)  | Bacillus phage phiAGATE (0.0)    | YP_007349368.1 | Bacillus phage phiAGATE (0.0)    | putative recombination related exonuclease                |
| 93  | -(58154..58423) | 89   | 10.27(4.79)  | Bacillus phage phiAGATE (7e-50)  | YP_007349369.1 | Bacillus phage phiAGATE (7e-50)  | hypothetical protein                                      |
| 94  | -(58420..59475) | 351  | 40.14(5.15)  | Bacillus phage phiAGATE (0.0)    | YP_007349370.1 | Bacillus phage phiAGATE (0.0)    | putative recombination exonuclease                        |
| 95  | -(59477..60736) | 419  | 47.39(5.90)  | Bacillus phage phiAGATE (0.0)    | YP_007349371.1 | Bacillus phage phiAGATE (0.0)    | putative helicase                                         |
| 96  | -(60995..62695) | 566  | 65.21(5.80)  | Bacillus phage phiAGATE (0.0)    | YP_007349372.1 | Bacillus phage phiAGATE (0.0)    | putative transcriptional regulator                        |
| 97  | -(62784..65843) | 1019 | 115.89(8.88) | Bacillus phage phiAGATE (0.0)    | YP_007349377.1 | Bacillus phage phiAGATE (0.0)    | putative intein containing helicase/endonuclease protein  |
| 98  | -(66101..66274) | 57   | 6.72(8.04)   | Bacillus phage phiAGATE (1e-26)  | YP_007349375.1 | Bacillus phage phiAGATE (1e-26)  | hypothetical protein                                      |
| 99  | -(66298..69603) | 1101 | 12.19(4.86)  | Bacillus phage phiAGATE (0.0)    | YP_007349376.1 | Bacillus phage phiAGATE (0.0)    | putative tail protein                                     |
| 100 | -(69798..70328) | 176  | 19.92(4.80)  | Bacillus phage phiAGATE (3e-119) | YP_007349377.1 | Bacillus phage phiAGATE          | hypothetical protein                                      |



|     |                 |      |              |                                  |                |                                  |                                  |                                                              |  |  |
|-----|-----------------|------|--------------|----------------------------------|----------------|----------------------------------|----------------------------------|--------------------------------------------------------------|--|--|
|     |                 |      |              |                                  |                |                                  |                                  | (3e-119)                                                     |  |  |
| 101 | -(70519..71907) | 462  | 52.275(2.9)  | Bacillus phage phiAGATE (0.0)    | YP_007349378.1 | Bacillus phage phiAGATE (0.0)    | Bacillus phage phiAGATE (0.0)    | Putative baseplate protein                                   |  |  |
| 102 | -(71923..72969) | 348  | 39.11 (5.37) | Bacillus phage phiAGATE (0.0)    | YP_007349379.1 | Bacillus phage phiAGATE (0.0)    | Bacillus phage phiAGATE (0.0)    | putative baseplate J family protein                          |  |  |
| 103 | -(72983..73678) | 231  | 25.90(4.67)  | Bacillus phage phiAGATE (3e-162) | YP_007349380.1 | Bacillus phage phiAGATE (3e-162) | Bacillus phage phiAGATE (3e-162) | putative baseplate protein W                                 |  |  |
| 104 | -(73720..74223) | 167  | 19.23(4.53)  | Bacillus phage phiAGATE (1e-99)  | YP_007349381.1 | Bacillus phage phiAGATE (1e-99)  | Bacillus phage phiAGATE (1e-99)  | hypothetical protein                                         |  |  |
| 105 | -(74223..74984) | 253  | 28.09(8.50)  | Bacillus phage phiAGATE (3e-175) | YP_007349178.1 | Bacillus phage phiAGATE (3e-175) | Bacillus phage phiAGATE (3e-175) | hypothetical protein                                         |  |  |
| 106 | -(75046..75360) | 104  | 11.67(4.70)  | Bacillus phage phiAGATE (2e-37)  | YP_007349179.1 | Bacillus phage phiAGATE (2e-37)  | Bacillus phage phiAGATE (2e-37)  | hypothetical protein                                         |  |  |
| 107 | -(75408..75872) | 154  | 18.02(4.44)  | Bacillus phage phiAGATE (8e-62)  | YP_007349180.1 | Bacillus phage phiAGATE (8e-62)  | Bacillus phage phiAGATE (8e-62)  | hypothetical protein                                         |  |  |
| 108 | -(75888..78335) | 815  | 87.71(9.57)  | Bacillus phage phiAGATE (0.0)    | YP_007349181.1 | Bacillus phage phiAGATE (0.0)    | Bacillus phage phiAGATE (0.0)    | putative minor structural protein 2                          |  |  |
| 109 | -(78370..82122) | 1250 | 136.69(4.59) | Bacillus phage phiAGATE (0.0)    | YP_007349182.1 | Bacillus phage phiAGATE (0.0)    | Bacillus phage phiAGATE (0.0)    | putative minor structural protein 1                          |  |  |
| 110 | -(82136..84166) | 676  | 75.07(4.69)  | Bacillus phage phiAGATE (0.0)    | YP_007349183.1 | Bacillus phage phiAGATE (0.0)    | Bacillus phage phiAGATE (0.0)    | putative tail fiber protein                                  |  |  |
| 111 | -(84181..86178) | 665  | 73.60(5.25)  | Bacillus phage phiAGATE (0.0)    | YP_007349184.1 | Bacillus phage phiAGATE (0.0)    | Bacillus phage phiAGATE (0.0)    | putative tail lysin 1                                        |  |  |
| 112 | -(86427..90164) | 1245 | 131.96(9.02) | Bacillus phage phiAGATE (0.0)    | YP_007349185.1 | Bacillus phage phiAGATE (0.0)    | Bacillus phage phiAGATE (0.0)    | putative tail lysin 2                                        |  |  |
| 113 | 87451..88041    | 196  | 19.24(5.75)  |                                  |                |                                  |                                  | hypothetical protein                                         |  |  |
| 114 | -(90215..90805) | 196  | 22.49(4.40)  | Bacillus phage phiAGATE (2e-114) | YP_007349186.1 | Bacillus phage phiAGATE (2e-114) | Bacillus phage phiAGATE (2e-114) | hypothetical protein                                         |  |  |
| 115 | -(90852..91259) | 135  | 15.78(4.98)  | Bacillus phage phiAGATE (2e-69)  | YP_007349187.1 | Bacillus phage phiAGATE (2e-68)  | Bacillus phage phiAGATE (2e-68)  | hypothetical protein                                         |  |  |
| 116 | -(91343..91930) | 195  | 22.73(7.79)  | Bacillus phage phiAGATE (2e-90)  | YP_007349188.1 | Bacillus phage phiAGATE (2e-90)  | Bacillus phage phiAGATE (2e-90)  | hypothetical protein                                         |  |  |
| 117 | -(92039..92647) | 202  | 21.01(9.56)  | Bacillus phage phiAGATE (6e-130) | YP_007349189.1 | Bacillus phage phiAGATE (6e-130) | Bacillus phage phiAGATE (6e-130) | putative cell wall-binding, peptidase-related domain protein |  |  |
| 118 | -(92801..93202) | 135  | 15.08(6.58)  | Bacillus phage Grass (3e-59)     | AGY47482.1     | Bacillus phage Grass (3e-59)     | Bacillus phage Grass (3e-59)     | hypothetical protein                                         |  |  |
| 119 | -(93216..93563) | 115  | 13.49(4.81)  | Bacillus phage phiAGATE (8e-07)  | YP_007349190.1 | Bacillus phage phiAGATE (8e-07)  | Bacillus phage phiAGATE (8e-07)  | hypothetical protein                                         |  |  |
| 120 | -(93585..93938) | 117  | 13.45(4.60)  | Bacillus phage phiAGATE (3e-09)  | YP_007349190.1 | Bacillus phage phiAGATE (3e-09)  | Bacillus phage phiAGATE (3e-09)  | hypothetical protein                                         |  |  |

|     |                   |      |              |                                  |                |                                   |                               |
|-----|-------------------|------|--------------|----------------------------------|----------------|-----------------------------------|-------------------------------|
| 121 | -(94056..94430)   | 124  | 13.96(5.15)  | Bacillus phage phiAGATE (2e-83)  | YP_007349191.1 | Bacillus phage phiAGATE (2e-83)   | putative structural protein   |
| 122 | -(94534..96246)   | 570  | 62.09(4.95)  | Bacillus phage phiAGATE (0.0)    | YP_007349192.1 | Bacillus phage phiAGATE (0.0)     | putative tail sheath protein  |
| 123 | -(96274..96576)   | 100  | 11.92(9.79)  | Bacillus phage phiAGATE (3e-34)  | YP_007349193.1 | Bacillus phage phiAGATE (3e-34)   | hypothetical protein          |
| 124 | -(96506..97192)   | 228  | 25.92(4.55)  | Bacillus phage phiAGATE (3e-121) | YP_007349194.1 | Bacillus phage phiAGATE (3e-121)  | hypothetical protein          |
| 125 | -(97382..97966)   | 194  | 22.59(10.71) | Bacillus phage phiAGATE (1e-132) | YP_007349195.1 | Bacillus phage phiAGATE (1e-132)  | hypothetical protein          |
| 126 | -(98007..98849)   | 280  | 31.60(7.63)  | Bacillus phage phiAGATE (4e-175) | YP_007349196.1 | Bacillus phage phiAGATE (4e-175)  | hypothetical protein          |
| 127 | -(98863..99510)   | 215  | 24.15(5.95)  | Bacillus phage phiAGATE (5e-133) | YP_007349197.1 | Bacillus phage phiAGATE (5e-133)  | hypothetical protein          |
| 128 | -(99759..100037)  | 92   | 10.30(8.85)  | Bacillus phage phiAGATE (5e-21)  | YP_007349198.1 | Bacillus phage phiAGATE (5e-21)   | hypothetical protein          |
| 129 | -(100119..101540) | 473  | 52.10(5.18)  | Bacillus phage phiAGATE (0.0)    | YP_007349199.1 | Bacillus phage phiAGATE (0.0)     | putative major capsid protein |
| 130 | -(101670..102617) | 315  | 35.10(4.50)  | Bacillus phage phiAGATE (1e-87)  | YP_007349200.1 | Bacillus phage phiAGATE (1e-87)   | hypothetical protein          |
| 131 | -(102622..103092) | 156  | 17.76(9.18)  | Bacillus phage phiAGATE (1e-105) | YP_007349201.1 | Bacillus phage phiAGATE (1e-105)  | putative prohead protease     |
| 132 | -(103532..105187) | 551  | 62.56(5.76)  | Bacillus phage phiAGATE (0.0)    | YP_007349202.1 | Bacillus phage phiAGATE (0.0)     | putative portal protein       |
| 133 | -(105218..105475) | 85   | 9.76(5.22)   | Bacillus phage phiAGATE (7e-41)  | YP_007349203.1 | Bacillus phage phiAGATE (7e-41)   | hypothetical protein          |
| 134 | -(105609..105995) | 1218 | 15.05(6.43)  | Bacillus subtilis (0.14)         | WP_017697671.1 |                                   | hypothetical protein          |
| 135 | -(105988..106359) | 123  | 13.90(5.03)  | Bacillus phage phiAGATE (4e-47)  | YP_007349205.1 | Bacillus phage phiAGATE (4e-47)   | hypothetical protein          |
| 136 | -(106442..106819) | 125  | 13.85(4.58)  | Bacillus macauensis (4e-62)      | WP_007201862.1 | Streptococcus phage O1205 (2e-43) | hypothetical protein          |
| 137 | -(107199..107348) | 49   | 5.50(4.88)   | Synechococcus sp. CB0205 (1.4)   |                | WP_010316034.1                    | hypothetical protein          |
| 138 | -(107373..107894) | 173  | 19.945(6.86) | Bacillus phage phiAGATE (7e-109) | YP_007349206.1 | Bacillus phage phiAGATE (7e-109)  | hypothetical protein          |
| 139 | -(107965..108258) | 97   | 11.44(6.83)  | Bacillus phage phiAGATE (9e-08)  | YP_007349207.1 | Bacillus phage phiAGATE           | hypothetical protein          |

|     |                   |     |              |                                        |                |                                      |                                                     |
|-----|-------------------|-----|--------------|----------------------------------------|----------------|--------------------------------------|-----------------------------------------------------|
| 140 | -(108346..108639) | 97  | 11.70(5.13)  | Bacillus phage phiAGATE (3e-45)        | YP_007349207.1 | Bacillus phage phiAGATE (3e-45)      | hypothetical protein                                |
| 141 | -(108799..109323) | 174 | 20.47(5.27)  | Bacillus amyloliquefaciens LL3 (4e-80) | YP_005546027.1 | Bacillus phage SPBc2 (5e-78)         | SPBc2 prophage-derived 5'(3')-deoxyribonucleotidase |
| 142 | -(110259..110546) | 95  | 11.11(5.16)  | Bacillus phage phiAGATE (9e-34)        | YP_007349208.1 | Bacillus phage phiAGATE (9e-34)      | hypothetical protein                                |
| 143 | 112308..112628    | 106 | 12.63(6.62)  | Bacillus phage phiAGATE (2e-51)        | YP_007349210.1 | Bacillus phage phiAGATE (2e-51)      | putative lambda repressor-like DNA-binding protein  |
| 144 | 112697..112822    | 41  | 4.45(6.50)   |                                        |                |                                      | hypothetical protein                                |
| 145 | -(112911..113237) | 108 | 12.50(4.93)  | Bacillus phage phiAGATE (4e-66)        | YP_007349212.1 | Bacillus phage phiAGATE (4e-66)      | hypothetical protein                                |
| 146 | -(113264..113614) | 116 | 13.70(5.30)  | Bacillus phage phiAGATE (4e-71)        | YP_007349213.1 | Bacillus phage phiAGATE (4e-71)      | hypothetical protein                                |
| 147 | -(113604..113894) | 96  | 10.55(6.70)  | Bacillus phage phiAGATE (2e-46)        | YP_007349214.1 | Bacillus phage phiAGATE (2e-46)      | hypothetical protein                                |
| 148 | 114002..117274    | 90  | 10.25(10.69) | Bacillus phage phiAGATE (3e-38)        | YP_007349215.1 | Bacillus phage phiAGATE (3e-38)      | hypothetical protein                                |
| 149 | 114286..114792    | 168 | 19.91(4.11)  | Bacillus phage phiAGATE (3e-62)        | YP_007349216.1 | Bacillus phage phiAGATE (3e-62)      | hypothetical protein                                |
| 150 | 115063..115479    | 138 | 15.17(4.50)  | Bacillus phage phiAGATE (2e-74)        | YP_007349217.1 | Bacillus phage phiAGATE (2e-74)      | hypothetical protein                                |
| 151 | 115479..117278    | 599 | 68.49(6.89)  | Bacillus phage vB_BceM-Bc431v3 (0.0)   | YP_007676908.1 | Bacillus phage vB_BceM-Bc431v3 (0.0) | terminase large subunit                             |
| 152 | 117344..118204    | 286 | 32.39(5.88)  | Bacillus phage phiAGATE (9e-149)       | YP_007349221.1 | Bacillus phage phiAGATE (9e-149)     | hypothetical protein                                |
| 153 | 118173..118862    | 229 | 25.85(5.02)  | Bacillus phage phiAGATE (6e-126)       | YP_007349222.1 | Bacillus phage phiAGATE (6e-126)     | hypothetical protein                                |
| 154 | 118855..119190    | 111 | 12.65(6.29)  | Bacillus phage phiAGATE (1e-61)        | YP_007349223.1 | Bacillus phage phiAGATE (1e-61)      | hypothetical protein                                |
| 155 | 119255..120193    | 312 | 33.56(9.83)  | Bacillus phage phiAGATE (0.0)          | YP_007349224.1 | Bacillus phage phiAGATE (0.0)        | putative N-acetylmuramoyl-L-alanine amidase         |
| 156 | 120522..121241    | 239 | 26.82(6.00)  | Bacillus phage phiAGATE (3e-164)       | YP_007349225.1 | Bacillus phage phiAGATE (3e-164)     | putative PhoH family protein                        |
| 157 | 121241..122248    | 335 | 38.03(4.34)  | Bacillus phage phiAGATE (5e-66)        | YP_007349226.1 | Bacillus phage phiAGATE (5e-66)      | hypothetical protein                                |
| 158 | 122344..123822    | 492 | 57.98(7.22)  | Bacillus phage phiAGATE (0.0)          | YP_007349227.1 | Bacillus phage phiAGATE (0.0)        | putative PcfJ protein                               |

|     |                   |     |             |                                  |                |                                   |                                         |
|-----|-------------------|-----|-------------|----------------------------------|----------------|-----------------------------------|-----------------------------------------|
| 159 | 123908..124459    | 183 | 21.19(4.96) | Bacillus phage phiAGATE (3e-125) | YP_007349228.1 | Bacillus phage phiAGATE (3e-125)  | hypothetical protein                    |
| 160 | 124684..124797    | 37  | 4.49(5.12)  | Bacillus phage phiAGATE (5e-18)  | YP_007349229.1 | Bacillus phage phiAGATE (5e-18)   | hypothetical protein                    |
| 161 | 125037..125729    | 230 | 26.22(6.34) | Bacillus phage phiAGATE (2e-162) | YP_007349230.1 | Bacillus phage phiAGATE (2e-162)  | putative thymidylate synthase           |
| 162 | 125751..126386    | 211 | 24.61(5.54) | Bacillus phage phiAGATE (1e-146) | YP_007349231.1 | Bacillus phage phiAGATE (1e-146)  | putative adenylate kinase-like protein  |
| 163 | 126401..126886    | 161 | 18.93(5.80) | Bacillus phage phiAGATE (2e-115) | YP_007349232.1 | Bacillus phage phiAGATE (2e-115)  | putative dihydrofolate reductase        |
| 164 | 126903..127700    | 265 | 30.68(4.43) | Bacillus phage phiAGATE (1e-172) | YP_007349233.1 | Bacillus phage phiAGATE (1e-172)  | hypothetical protein                    |
| 165 | 128016..128426    | 136 | 15.58(4.91) | Bacillus phage phiAGATE (2e-51)  | YP_007349234.1 | Bacillus phage phiAGATE (2e-51)   | hypothetical protein                    |
| 166 | 128529..129098    | 189 | 22.07(6.01) | Bacillus phage phiAGATE (1e-35)  | YP_007349237.1 | Bacillus phage phiAGATE (1e-35)   | hypothetical protein                    |
| 167 | 129088..129606    | 172 | 20.07(5.12) | Bacillus phage phiAGATE (4e-80)  | YP_007349238.1 | Bacillus phage phiAGATE (4e-80)   | hypothetical protein                    |
| 168 | 129887..130027    | 46  | 5.35(4.52)  | Bacillus phage phiAGATE (0.99)   | YP_007349239.1 | Bacillus phage phiAGATE (0.99)    | hypothetical protein                    |
| 169 | 130020..130280    | 86  | 10.12(4.92) | Bacillus phage phiAGATE (2e-40)  | YP_007349240.1 | Bacillus phage phiAGATE (2e-40)   | hypothetical protein                    |
| 170 | 130347..130856    | 169 | 19.55(5.80) | Bacillus phage phiAGATE (1e-41)  | YP_007349241.1 | Bacillus phage phiAGATE (1e-41)   | hypothetical protein                    |
| 171 | 130877..131260    | 127 | 14.38(4.68) | Bacillus phage phiAGATE (0.54)   | YP_007349241.1 | Bacillus phage phiAGATE (0.54)    | hypothetical protein                    |
| 172 | 131669..133258    | 529 | 58.40(5.77) | Bacillus phage phiAGATE (0.0)    | YP_007349242.1 | Bacillus phage phiAGATE (0.0)     | putative Pectin lyase-like protein      |
| 173 | 133368..133967    | 199 | 22.07(5.39) | Bacillus phage phiAGATE (1e-118) | YP_007349243.1 | Bacillus phage phiAGATE (1e-118)  | putative poly-gamma-glutamate hydrolase |
| 174 | -(134412..134756) | 114 | 13.23(4.46) | Bacillus phage phiAGATE (2e-40)  | YP_007349244.1 | Bacillus phage phiAGATE (2e-40)   | hypothetical protein                    |
| 175 | -(134846..135064) | 72  | 8.78(4.36)  | Rhizobium leguminosarum (0.11)   | WP_003565261.1 | Lactobacillus phage JCL1032 (3.6) | hypothetical protein                    |
| 176 | -(135155..135394) | 79  | 9.23(5.07)  | Bacillus phage phiAGATE (3e-34)  | YP_007349245.1 | Bacillus phage phiAGATE (3e-34)   | hypothetical protein                    |
| 177 | -(135387..135677) | 96  | 11.06(4.24) | Bacillus phage phiAGATE (1e-47)  | YP_007349246.1 | Bacillus phage phiAGATE (1e-47)   | hypothetical protein                    |

|     |                   |     |             |                                                          |                                 |                                  |                      |
|-----|-------------------|-----|-------------|----------------------------------------------------------|---------------------------------|----------------------------------|----------------------|
| 178 | -(135765..136193) | 142 | 16.52(4.22) | Bacillus phage phiAGATE (2e-53)                          | YP_007349247.1                  | Bacillus phage phiAGATE (2e-53)  | hypothetical protein |
| 179 | -(136202..136453) | 83  | 9.62(4.43)  | candidate division BRC1 bacterium SCGC AAA252-M09 (0.80) | WP_020249241.1                  |                                  | hypothetical protein |
| 180 | -(136710..137081) | 123 | 13.77(4.58) | Bacillus phage phiAGATE (2e-53)                          | YP_007349249.1                  | Bacillus phage phiAGATE (2e-53)  | hypothetical protein |
| 181 | -(137506..137718) | 70  | 8.11(4.16)  | Comamonas testosteroni CNB-2 (1.0)                       | YP_003277363.1                  |                                  | hypothetical protein |
| 182 | -(137835..138044) | 69  | 8.35(6.71)  | Bacillus thuringiensis HD-789 (2e-09)                    | YP_006624439.1                  |                                  | hypothetical protein |
| 183 | -(137835..138044) | 128 | 15.38(4.87) | Bacillus phage phiAGATE (2e-09)                          | YP_007349251.1                  | Bacillus phage phiAGATE (2e-09)  | hypothetical protein |
| 184 | -(138595..138792) | 65  | 7.30(4.28)  | Bacteroides (2.5)                                        | WP_007487658.1                  |                                  | hypothetical protein |
| 185 | -(138820..139236) | 138 | 16.28(4.58) | Bacillus phage phiAGATE (3e-72)                          | YP_007349251.1                  | Bacillus phage phiAGATE (3e-72)  | hypothetical protein |
| 186 | -(139302..139739) | 145 | 17.14(4.37) | Bacillus phage phiAGATE (1e-82)                          | YP_007349253.1                  | Bacillus phage phiAGATE (1e-82)  | hypothetical protein |
| 187 | -(139743..139913) | 56  | 6.81(7.98)  | Prevotella sp. MSX73 (7.4)                               | WP_007411973.1                  |                                  | hypothetical protein |
| 188 | -(140016..140201) | 61  | 7.37(3.99)  | Halorubrum phage GNf2 (0.40)                             | AGF91265.1                      | Halorubrum phage GNf2 (0.40)     | hypothetical protein |
| 189 | -(140285..140533) | 82  | 9.42(4.66)  | Ichthyophthirius multifiliis (1.6)                       | XP_004036927.1                  |                                  | hypothetical protein |
| 190 | -(140650..140862) | 70  | 8.28(5.00)  | Clostridium saccharoperbutylaceticum N1-4(HMT) (0.75)    | YP_007456357.1                  |                                  | hypothetical protein |
| 191 | -(140856..141176) | 106 | 12.29(6.03) | Bacillus phage SPP1 (1e-06)                              | NP_690744.1                     | Bacillus phage SPP1 (1e-06)      | hypothetical protein |
| 192 | -(141255..141497) | 80  | 9.35(3.74)  | Bacillus phage phiAGATE (8e-29)                          | YP_007349255.1<br>YP_00734926.1 | Bacillus phage phiAGATE (8e-29)  | hypothetical protein |
| 193 | -(141578..141979) | 133 | 15.67(3.87) | Bacillus phage phiAGATE (3e-48)                          | YP_007349257.1                  | Bacillus phage phiAGATE (3e-48)  | hypothetical protein |
| 194 | -(141981..142223) | 80  | 9.07(5.00)  | Bacillus phage phiAGATE (2e-43)                          | YP_007349258.1                  | Bacillus phage phiAGATE (2e-43)  | hypothetical protein |
| 195 | -(142600..143151) | 183 | 21.95(5.31) | Bacillus phage phiAGATE (3e-118)                         | YP_007349262.1                  | Bacillus phage phiAGATE (3e-118) | hypothetical protein |
| 196 | -(143213..143509) | 98  | 11.26(4.16) | Ralstonia (0.68)                                         | WP_009239428.1                  |                                  | hypothetical protein |
| 197 | -(143522..143647) | 41  | 4.92(10.12) | Bacillus phage phiAGATE (4e-17)                          | YP_007349263.1                  | Bacillus phage phiAGATE (4e-17)  | hypothetical protein |
| 198 | -(143724..144281) | 185 | 21.86(4.19) | Bacillus phage phiAGATE (1e-68)                          | YP_007349264.1                  | Bacillus phage phiAGATE (1e-68)  | hypothetical protein |
| 199 | -(144383..144631) | 82  | 9.32(5.70)  | Bacillus phage phiAGATE (7e-45)                          | YP_007349265.1                  | Bacillus phage phiAGATE (7e-45)  | hypothetical protein |

|     |                   |     |             |                                           |                |                                 |                                                                 |
|-----|-------------------|-----|-------------|-------------------------------------------|----------------|---------------------------------|-----------------------------------------------------------------|
| 200 | -(144652..144804) | 50  | 5.79(6.01)  | Bacillus phage phiAGATE (3e-20)           | YP_007349266.1 | Bacillus phage phiAGATE (3e-20) | hypothetical protein                                            |
| 201 | -(144828..145079) | 83  | 9.60(6.04)  | Lactobacillus buchneri NRRL B-30929 (1.2) | YP_004399033.1 |                                 | hypothetical protein                                            |
| 202 | -(145115..145627) | 170 | 20.00(3.88) | Bacillus phage phiAGATE (7e-61)           | YP_007349267.1 | Bacillus phage phiAGATE (7e-61) | hypothetical protein                                            |
| 203 | -(145894..146526) | 210 | 23.49(4.10) | Bacillus phage phiAGATE (2e-55)           | YP_007349269.1 | Bacillus phage phiAGATE (2e-55) | hypothetical protein                                            |
| 204 | -(146613..146987) | 124 | 14.48(9.63) | Bacillus phage phiNIT1 (1e-39)            | YP_008318262.1 | Bacillus phage phiNIT1 (1e-39)  | hypothetical protein                                            |
| 205 | -(147206..147445) | 79  | 8.81(4.32)  | Bacillus cereus (5e-13)                   | WP_000865212.1 |                                 | hypothetical protein                                            |
| 206 | -(147505..147903) | 132 | 15.59(4.65) | Bacillus phage phiAGATE (4e-52)           | YP_007349271.1 | Bacillus phage phiAGATE (4e-52) | hypothetical protein                                            |
| 207 | -(147900..148307) | 135 | 15.91(5.09) | Bacillus phage phiAGATE (2e-52)           | YP_007349272.1 | Bacillus phage phiAGATE (2e-52) | hypothetical protein                                            |
| 208 | -(148323..148802) | 159 | 18.29(5.40) | Parabacteroides (0.12)                    | WP_005855820.1 |                                 | hypothetical protein                                            |
| 209 | -(149139..150254) | 371 | 39.77(5.86) | Bacillus phage phiAGATE (2e-85)           | YP_007349274.1 | Bacillus phage phiAGATE (2e-85) | putative hexapeptide repeat containing transferase like protein |
| 210 | -(150244..150474) | 76  | 8.75(4.13)  | Bacillus phage Grass (1e-05)              | AGY47430.1     | Bacillus phage Grass (1e-05)    | hypothetical protein                                            |
| 211 | -(150576..151064) | 162 | 17.86(4.48) | Flavobacteria bacterium MS024-3C (0.40)   | WP_008867922.1 |                                 | hypothetical protein                                            |
| 212 | -(151051..151413) | 120 | 13.60(5.38) | Paenibacillus polymyxa SC2 (3e-09)        | YP_003965746.1 |                                 | hypothetical protein                                            |

---

Table S3. Feature of predicted tRNA from the genome of phage Bp8p-C

| Name                | Position          | Length | Triple codon | Corresponding amino acid |
|---------------------|-------------------|--------|--------------|--------------------------|
| tRNA <sup>Met</sup> | -(106842..106913) | 72     | CAU          | Met                      |
| tRNA <sup>His</sup> | -(109549..109619) | 71     | GUG          | His                      |
| tRNA <sup>Gly</sup> | -(109633..109703) | 71     | UCC          | Gly                      |
| tRNA <sup>Phe</sup> | -(110983..111052) | 72     | GAA          | Phe                      |
| tRNA <sup>Asn</sup> | -(111434..111505) | 72     | GUU          | Asn                      |

Table S4. Insert sequences found in Bp8p-C genome by using IS Finder

| Sequences producing significant alignments | IS Family   | Group   | Origin                             | Score (bits) | E (value) |
|--------------------------------------------|-------------|---------|------------------------------------|--------------|-----------|
| ISSpma1                                    | IS3         | IS407   | <i>Sphingopyxis macrogoltabida</i> | 40           | 0.73      |
| ISNgo3                                     | IS110       |         | <i>Neisseria gonorrhoeae</i>       | 40           | 0.73      |
| ISSusp4                                    | ISLre2      | ISAzba1 | <i>Sulfitobacter sp.</i>           | 38           | 2.9       |
| ISArsp6                                    | Tn3         |         | <i>Arthrobacter sp.</i>            | 38           | 2.9       |
| ISAcma27                                   | IS630       |         | <i>Acaryochloris marina</i>        | 38           | 2.9       |
| ISEc8                                      | IS66        |         | <i>Escherichia coli</i>            | 38           | 2.9       |
| IS231Q                                     | IS4         | IS231   | <i>Bacillus thuringiensis</i>      | 38           | 2.9       |
| IS605                                      | IS200/IS605 | -       | <i>Helicobacter pylori</i>         | 38           | 2.9       |

Table S5. Tandem repeats found in Bp8p-C genome by using Tandem Repeat Finder

| Indices        | Period Size | Copy Number | Consensus Size | Percent Matches | Percent Indels | Score | A  | C  | G  | T  | Entropy (0-2) |
|----------------|-------------|-------------|----------------|-----------------|----------------|-------|----|----|----|----|---------------|
| 33141--33178   | 18          | 2.1         | 18             | 90              | 0              | 58    | 7  | 21 | 36 | 34 | 1.82          |
| 36642--36704   | 6           | 11.0        | 6              | 90              | 10             | 105   | 0  | 17 | 49 | 33 | 1.47          |
| 135004--135052 | 24          | 2.0         | 24             | 96              | 0              | 89    | 16 | 20 | 6  | 57 | 1.60          |
| 136688--136741 | 22          | 2.5         | 22             | 93              | 0              | 81    | 38 | 12 | 12 | 35 | 1.82          |
| 147114--147230 | 32          | 3.7         | 32             | 100             | 0              | 234   | 27 | 15 | 26 | 30 | 1.96          |
